# Supplementary material
Source: Elsevier journal article supplement (https://univ-rennes.hal.science/hal-01381134v1/file/mmc3.pdf)
Supplement: mmc3 [file mmc3.pdf]

## Supplementary information to

**Non-covalently generated 3D supramolecular crystal structure in a new family of hybrid nitrates **templated by piperazine**: thermal behavior and *in vitro* antimicrobial potential**

Dhouha Ben Hassan<sup>a</sup>, Walid Rekik<sup>a</sup>, Alberto Otero-de-la Roza<sup>b</sup>, Fedia Ben

Mefteh<sup>c</sup>, Thierry Roisnel<sup>d</sup>, Thierry Bataille<sup>e</sup> and Houcine Naïli<sup>a,\*</sup>

<sup>a</sup> : *Laboratoire Physicochimie de l'État Solide, Département de Chimie, Faculté des Sciences de Sfax, Université de Sfax, BP 1171, 3000, Tunisia.*

<sup>b</sup> : *National Institute for Nanotechnology, National Research Council of Canada, 11421 Saskatchewan Drive, Edmonton, Alberta Canada T6G 2M9.*

<sup>c</sup> : *Laboratory of plant biotechnology. Faculty of sciences, University of Sfax, B.P 1171, 3000, Tunisia.*

<sup>d</sup> : *Institut des Sciences Chimiques de Rennes (ISCR), UMR 6226 CNRS-Université de Rennes 1, Campus de Beaulieu, 263 avenue du General Leclerc, Bat 10A, 35042 Rennes Cedex, France.*

<sup>e</sup> : *Ecole Nationale Supérieure de Chimie de Rennes, 11 Allée de Beaulieu F-35708 RENNES cedex 7, France.*

Corresponding author:

*E-mail address: [houcine\\_naïli@yahoo.com](mailto:houcine_naïli@yahoo.com)*

Tel: +216 98 66 00 26; fax: +216 74 274 437

Table SI3: Selected bond distances and angles relative to the protonated piperazine moiety

---

Compound (1)    Compound (2)    Compound (3)

|                        |             |             |             |
|------------------------|-------------|-------------|-------------|
| C1—C2                  | 1.516 (2)   | 1.507 (2)   | 1.515 (3)   |
| C3—C4                  | 1.518 (2)   | 1.513 (2)   | 1.514 (3)   |
| C5—C6                  | 1.517 (2)   | 1.513 (2)   | 1.512 (3)   |
| N5—C2                  | 1.485 (2)   | 1.487 (2)   | 1.492 (3)   |
| N5—C3                  | 1.491 (2)   | 1.490 (2)   | 1.488 (3)   |
| N6—C1                  | 1.494 (2)   | 1.496 (2)   | 1.489 (3)   |
| N6—C4                  | 1.482 (2)   | 1.484 (2)   | 1.487 (3)   |
| N7—C5                  | 1.497 (2)   | 1.495 (2)   | 1.495 (3)   |
| N7—C6 <sup>ii</sup>    | 1.492 (2)   | 1.486 (2)   | 1.486 (3)   |
| C2—C1—N6               | 110.56 (14) | 110.34 (13) | 110.27 (19) |
| C1—C2—N5               | 109.11 (13) | 109.83 (12) | 109.0 (2)   |
| C4—C3—N5               | 110.11 (14) | 110.10 (13) | 110.34 (19) |
| C3—C4—N6               | 110.15 (13) | 109.84 (12) | 109.60 (19) |
| C2—N5—C3               | 111.70 (14) | 111.90 (14) | 111.34 (19) |
| C1—N6—C4               | 111.65 (14) | 111.66 (13) | 111.90 (19) |
| C6—C5—N7               | 110.05 (14) | 110.09 (13) | 110.11 (19) |
| C5—C6—N7 <sup>ii</sup> | 109.82 (14) | 109.60 (13) | 109.5 (2)   |
| C5—N7—C6 <sup>ii</sup> | 110.72 (13) | 111.10 (13) | 110.49 (19) |

---

Symmetry code: (ii) -x+3, -y, -z+1.

---
